# Supplementary material for: Development of a metabolites risk score for one-year mortality risk prediction in pancreatic adenocarcinoma patients
Source: PubMed Central journal article supplement (PMC4891018; doi:10.18632/oncotarget.7108), 2016-02-01
Supplement: oncotarget-07-8968-s001.pdf [file oncotarget-07-8968-s001.pdf]

## Development of a metabolites risk score for one-year mortality risk prediction in pancreatic adenocarcinoma patients

### Supplementary Materials

**Supplementary Table 1: Concentration levels ( $\mu\text{mol/L}$ ) for each metabolite of patients with pancreatic cancer (median, first–third quartiles)**

| Metabolite      | <i>N</i> of available patients |                        |
|-----------------|--------------------------------|------------------------|
| C0              | <i>N</i> = 27                  | 39.93 (32.76–46.33)    |
| C10:2           | <i>N</i> = 27                  | 0.05 (0.04–0.09)       |
| C12–DC          | <i>N</i> = 27                  | 0.06 (0.03–0.08)       |
| C14:1           | <i>N</i> = 27                  | 0.28 (0.22–0.34)       |
| C14:2           | <i>N</i> = 27                  | 0.05 (0.03–0.06)       |
| C14:2–OH        | <i>N</i> = 27                  | 0.02 (0.01–0.02)       |
| C16             | <i>N</i> = 27                  | 0.10 (0.06–0.16)       |
| C16–OH          | <i>N</i> = 27                  | 0.02 (0.01–0.03)       |
| C16:1           | <i>N</i> = 27                  | 0.05 (0.04–0.06)       |
| C16:2           | <i>N</i> = 27                  | 0.02 (0.01–0.03)       |
| C16:2–OH        | <i>N</i> = 27                  | 0.02 (0.02–0.03)       |
| C18             | <i>N</i> = 27                  | 0.05 (0.02–0.08)       |
| C18:1           | <i>N</i> = 27                  | 0.25 (0.17–0.30)       |
| C18:1–OH        | <i>N</i> = 27                  | 0.03 (0.02–0.04)       |
| C18:2           | <i>N</i> = 27                  | 0.07 (0.04–0.09)       |
| C2              | <i>N</i> = 27                  | 6.66 (4.14–9.42)       |
| C3              | <i>N</i> = 16                  | 0.27 (0.18–0.42)       |
| C3–DC (C4–OH)   | <i>N</i> = 27                  | 0.13 (0.09–0.17)       |
| C3–OH           | <i>N</i> = 27                  | 0.04 (0.03–0.05)       |
| C3:1            | <i>N</i> = 27                  | 0.02 (0.01–0.02)       |
| C4:1            | <i>N</i> = 27                  | 0.02 (0.02–0.03)       |
| C5              | <i>N</i> = 27                  | 0.12 (0.09–0.18)       |
| C5–OH (C3–DC–M) | <i>N</i> = 27                  | 0.10 (0.08–0.13)       |
| C5:1            | <i>N</i> = 27                  | 0.02 (0.02–0.03)       |
| C5:1–DC         | <i>N</i> = 27                  | 0.03 (0.02–0.04)       |
| C6:1            | <i>N</i> = 27                  | 0.05 (0.04–0.06)       |
| C7–DC           | <i>N</i> = 27                  | 0.03 (0.02–0.04)       |
| C9              | <i>N</i> = 27                  | 0.04 (0.03–0.06)       |
| Ala             | <i>N</i> = 27                  | 501.70 (390.60–759.80) |
| Arg             | <i>N</i> = 27                  | 120.90 (103.40–151.80) |
| Asn             | <i>N</i> = 27                  | 62.50 (55.10–67.30)    |
| Gln             | <i>N</i> = 27                  | 259.10 (194.50–367.80) |
| Glu             | <i>N</i> = 27                  | 110.50 (77.60–176.20)  |

|                |               |                        |
|----------------|---------------|------------------------|
| Gly            | <i>N</i> = 27 | 263.30 (234.10–303.90) |
| His            | <i>N</i> = 27 | 83.20 (63.30–94.80)    |
| Ile            | <i>N</i> = 27 | 88.20 (70.40–109.40)   |
| Leu            | <i>N</i> = 27 | 23.70 (1.50–68.80)     |
| Lys            | <i>N</i> = 27 | 200.70 (163.90–251.10) |
| Met            | <i>N</i> = 27 | 32.80 (28.30–39.70)    |
| Orn            | <i>N</i> = 27 | 92.20 (70.00–117.30)   |
| Phe            | <i>N</i> = 27 | 108.10 (88.50–127.60)  |
| Pro            | <i>N</i> = 27 | 197.60 (161.00–275.20) |
| Ser            | <i>N</i> = 26 | 129.90 (92.00–172.00)  |
| Thr            | <i>N</i> = 27 | 211.90 (142.10–310.20) |
| Trp            | <i>N</i> = 27 | 57.30 (35.90–64.60)    |
| Tyr            | <i>N</i> = 27 | 69.00 (64.10–86.80)    |
| Val            | <i>N</i> = 27 | 217.40 (189.70–295.60) |
| alpha-AAA      | <i>N</i> = 27 | 8.90 (0.30–9.00)       |
| Creatinine     | <i>N</i> = 27 | 172.30 (123.40–225.40) |
| Kynurenine     | <i>N</i> = 27 | 1.90 (0.90–2.80)       |
| Putrescine     | <i>N</i> = 27 | 0.30 (0.03–0.40)       |
| SDMA           | <i>N</i> = 27 | 0.60 (0.40–0.90)       |
| Serotonin      | <i>N</i> = 27 | 0.60 (0.20–1.20)       |
| Spermidine     | <i>N</i> = 27 | 0.30 (0.30–0.50)       |
| t4-OH-Pro      | <i>N</i> = 27 | 11.10 (6.90–19.00)     |
| Taurine        | <i>N</i> = 27 | 184.90 (120.50–211.90) |
| lysoPC a C16:0 | <i>N</i> = 27 | 82.71 (44.88–118.54)   |
| lysoPC a C16:1 | <i>N</i> = 27 | 2.69 (1.98–3.74)       |
| lysoPC a C17:0 | <i>N</i> = 27 | 1.43 (0.94–2.21)       |
| lysoPC a C18:0 | <i>N</i> = 27 | 18.25 (10.47–30.39)    |
| lysoPC a C18:1 | <i>N</i> = 27 | 21.32 (14.86–26.36)    |
| lysoPC a C18:2 | <i>N</i> = 27 | 15.47 (10.26–23.91)    |
| lysoPC a C20:3 | <i>N</i> = 27 | 2.25 (1.57–2.83)       |
| lysoPC a C20:4 | <i>N</i> = 27 | 5.75 (4.26–8.68)       |
| lysoPC a C24:0 | <i>N</i> = 27 | 0.71 (0.53–0.98)       |
| lysoPC a C26:0 | <i>N</i> = 27 | 1.33 (1.13–1.59)       |
| lysoPC a C26:1 | <i>N</i> = 27 | 1.03 (0.72–1.30)       |
| lysoPC a C28:0 | <i>N</i> = 27 | 1.57 (1.06–1.74)       |
| lysoPC a C28:1 | <i>N</i> = 27 | 1.77 (1.27–2.32)       |
| PC aa C24:0    | <i>N</i> = 27 | 0.28 (0.22–0.36)       |
| PC aa C26:0    | <i>N</i> = 27 | 1.56 (1.37–2.25)       |
| PC aa C28:1    | <i>N</i> = 27 | 1.30 (0.98–1.54)       |
| PC aa C30:0    | <i>N</i> = 27 | 2.97 (1.96–4.89)       |
| PC aa C32:0    | <i>N</i> = 27 | 9.49 (7.87–22.10)      |
| PC aa C32:1    | <i>N</i> = 27 | 11.62 (7.53–25.94)     |
| PC aa C32:3    | <i>N</i> = 27 | 0.17 (0.13–0.27)       |
| PC aa C34:1    | <i>N</i> = 27 | 191.71 (149.76–371.64) |

|             |               |                        |
|-------------|---------------|------------------------|
| PC aa C34:2 | <i>N</i> = 27 | 205.54 (170.16–312.52) |
| PC aa C34:3 | <i>N</i> = 27 | 5.93 (4.38–10.94)      |
| PC aa C34:4 | <i>N</i> = 27 | 0.53 (0.33–0.87)       |
| PC aa C36:0 | <i>N</i> = 27 | 4.19 (3.01–4.72)       |
| PC aa C36:1 | <i>N</i> = 27 | 30.17 (22.97–45.49)    |
| PC aa C36:2 | <i>N</i> = 27 | 107.98 (83.72–155.78)  |
| PC aa C36:3 | <i>N</i> = 27 | 69.72 (51.17–94.08)    |
| PC aa C36:4 | <i>N</i> = 27 | 112.84 (90.09–209.62)  |
| PC aa C36:5 | <i>N</i> = 27 | 6.10 (4.18–9.08)       |
| PC aa C36:6 | <i>N</i> = 27 | 0.33 (0.28–0.55)       |
| PC aa C38:0 | <i>N</i> = 27 | 1.81 (1.28–2.44)       |
| PC aa C38:3 | <i>N</i> = 27 | 23.44 (16.52–37.79)    |
| PC aa C38:4 | <i>N</i> = 27 | 54.80 (38.32–73.86)    |
| PC aa C38:5 | <i>N</i> = 27 | 22.97 (16.10–31.54)    |
| PC aa C38:6 | <i>N</i> = 27 | 35.19 (25.52–60.44)    |
| PC aa C40:1 | <i>N</i> = 27 | 0.45 (0.40–0.50)       |
| PC aa C40:2 | <i>N</i> = 27 | 0.47 (0.34–0.64)       |
| PC aa C40:3 | <i>N</i> = 27 | 0.49 (0.35–0.66)       |
| PC aa C40:4 | <i>N</i> = 27 | 1.82 (1.48–2.92)       |
| PC aa C40:5 | <i>N</i> = 27 | 4.91 (3.57–7.65)       |
| PC aa C40:6 | <i>N</i> = 27 | 10.42 (8.62–17.95)     |
| PC aa C42:0 | <i>N</i> = 27 | 0.38 (0.30–0.45)       |
| PC aa C42:1 | <i>N</i> = 27 | 0.20 (0.16–0.25)       |
| PC aa C42:2 | <i>N</i> = 27 | 0.17 (0.14–0.25)       |
| PC aa C42:4 | <i>N</i> = 27 | 0.20 (0.15–0.26)       |
| PC aa C42:5 | <i>N</i> = 27 | 0.22 (0.18–0.36)       |
| PC aa C42:6 | <i>N</i> = 27 | 0.30 (0.23–0.44)       |
| PC ae C30:0 | <i>N</i> = 27 | 0.41 (0.36–0.59)       |
| PC ae C30:1 | <i>N</i> = 27 | 0.38 (0.32–0.49)       |
| PC ae C30:2 | <i>N</i> = 27 | 0.23 (0.18–0.29)       |
| PC ae C32:1 | <i>N</i> = 27 | 1.55 (1.30–2.53)       |
| PC ae C32:2 | <i>N</i> = 27 | 0.39 (0.31–0.49)       |
| PC ae C34:0 | <i>N</i> = 27 | 1.06 (0.75–1.73)       |
| PC ae C34:1 | <i>N</i> = 27 | 6.49 (4.91–11.92)      |
| PC ae C34:2 | <i>N</i> = 27 | 4.60 (3.19–6.35)       |
| PC ae C34:3 | <i>N</i> = 27 | 2.33 (1.70–3.37)       |
| PC ae C36:0 | <i>N</i> = 27 | 1.29 (0.94–2.16)       |
| PC ae C36:1 | <i>N</i> = 27 | 8.43 (6.16–13.24)      |
| PC ae C36:2 | <i>N</i> = 27 | 6.31 (5.21–9.44)       |
| PC ae C36:3 | <i>N</i> = 27 | 3.17 (2.08–4.19)       |
| PC ae C36:4 | <i>N</i> = 27 | 7.39 (5.80–10.28)      |
| PC ae C36:5 | <i>N</i> = 27 | 6.02 (4.49–7.23)       |
| PC ae C38:0 | <i>N</i> = 27 | 0.93 (0.64–1.46)       |
| PC ae C38:1 | <i>N</i> = 27 | 2.54 (1.89–3.45)       |

|                            |               |                           |
|----------------------------|---------------|---------------------------|
| PC ae C38:2                | <i>N</i> = 27 | 2.17 (1.71–3.09)          |
| PC ae C38:3                | <i>N</i> = 27 | 3.70 (2.63–4.86)          |
| PC ae C38:4                | <i>N</i> = 27 | 6.75 (5.65–10.06)         |
| PC ae C38:5                | <i>N</i> = 27 | 9.61 (8.00–12.26)         |
| PC ae C38:6                | <i>N</i> = 27 | 3.10 (2.71–3.99)          |
| PC ae C40:1                | <i>N</i> = 27 | 0.86 (0.61–1.07)          |
| PC ae C40:2                | <i>N</i> = 27 | 1.32 (0.94–1.69)          |
| PC ae C40:3                | <i>N</i> = 27 | 1.17 (0.92–1.50)          |
| PC ae C40:4                | <i>N</i> = 27 | 1.66 (1.20–2.03)          |
| PC ae C40:5                | <i>N</i> = 27 | 2.47 (1.94–3.21)          |
| PC ae C40:6                | <i>N</i> = 27 | 2.42 (1.84–2.88)          |
| PC ae C42:1                | <i>N</i> = 27 | 0.28 (0.23–0.43)          |
| PC ae C42:2                | <i>N</i> = 27 | 0.35 (0.26–0.42)          |
| PC ae C42:3                | <i>N</i> = 27 | 0.43 (0.34–0.54)          |
| PC ae C42:4                | <i>N</i> = 27 | 0.52 (0.42–0.68)          |
| PC ae C42:5                | <i>N</i> = 27 | 1.39 (1.12–1.81)          |
| PC ae C44:3                | <i>N</i> = 27 | 0.11 (0.09–0.15)          |
| PC ae C44:4                | <i>N</i> = 27 | 0.25 (0.20–0.33)          |
| PC ae C44:5                | <i>N</i> = 27 | 1.31 (0.99–1.58)          |
| PC ae C44:6                | <i>N</i> = 27 | 0.70 (0.53–0.92)          |
| SM (OH) C14:1              | <i>N</i> = 27 | 3.70 (2.85–4.63)          |
| SM (OH) C16:1              | <i>N</i> = 27 | 2.00 (1.41–2.39)          |
| SM (OH) C22:1              | <i>N</i> = 27 | 2.93 (1.49–5.19)          |
| SM (OH) C22:2              | <i>N</i> = 27 | 5.16 (2.66–8.19)          |
| SM C16:0                   | <i>N</i> = 27 | 63.63 (57.34–76.77)       |
| SM C16:1                   | <i>N</i> = 27 | 8.75 (7.02–9.81)          |
| SM C18:0                   | <i>N</i> = 27 | 18.72 (14.45–22.25)       |
| SM C18:1                   | <i>N</i> = 27 | 6.82 (4.94–8.54)          |
| SM C24:0                   | <i>N</i> = 27 | 12.94 (10.32–17.38)       |
| SM C24:1                   | <i>N</i> = 27 | 21.29 (0.52–38.43)        |
| H1                         | <i>N</i> = 27 | 5057.30 (4151.64–5708.51) |
| Progesteron                | <i>N</i> = 27 | 0.17 (0.16–0.18)          |
| 5- $\alpha$ -Cholestane    | <i>N</i> = 27 | 1.79 (1.16–3.75)          |
| Chol_Epoxyde               | <i>N</i> = 27 | 2.00 (1.88–2.13)          |
| 1, 2dilinoleoyl_PC         | <i>N</i> = 27 | 5.47 (3.16–12.45)         |
| 1, 2dioleoyl_GLP_Na2       | <i>N</i> = 27 | 5.38 (5.36–5.39)          |
| D-sphingosine              | <i>N</i> = 27 | 0.10 (0.06–0.13)          |
| C16-CAR2                   | <i>N</i> = 26 | 0.05 (0.04–0.06)          |
| Oleoyl-CAR                 | <i>N</i> = 26 | 0.13 (0.11–0.15)          |
| Lanosterol                 | <i>N</i> = 27 | 134.91 (122.86–145.51)    |
| CER_893_1                  | <i>N</i> = 27 | 1.05 (0.70–1.85)          |
| 1-palmitoyl-sn-glycero-3PC | <i>N</i> = 27 | 96.77 (60.97–147.00)      |
| BSitosterol                | <i>N</i> = 27 | 4.00 (3.06–5.24)          |
| glyceryltriolate1          | <i>N</i> = 27 | 80.89 (62.60–100.17)      |

|                           |               |                        |
|---------------------------|---------------|------------------------|
| 1, 2dioleoyl_PE           | <i>N</i> = 26 | 1.19 (0.98–1.37)       |
| cis-vaccenic_acid         | <i>N</i> = 27 | 72.56 (51.36–95.72)    |
| ArachidicAcid             | <i>N</i> = 27 | 4.09 (3.90–4.44)       |
| erucic acid               | <i>N</i> = 27 | 3.01 (2.90–3.10)       |
| StearicAcid               | <i>N</i> = 27 | 154.65 (144.81–169.06) |
| PalmiticAcid              | <i>N</i> = 27 | 15.65 (14.81–16.78)    |
| LinoleicAcid              | <i>N</i> = 27 | 37.61 (21.95–66.41)    |
| DocosahexaenoicAcid       | <i>N</i> = 27 | 5.35 (4.19–7.47)       |
| PalmitoleicAcid           | <i>N</i> = 27 | 31.64 (20.87–47.33)    |
| BehenicAcid               | <i>N</i> = 27 | 0.76 (0.47–1.23)       |
| MyristicAcid              | <i>N</i> = 27 | 25.08 (21.75–27.37)    |
| LinolenicAcid             | <i>N</i> = 27 | 2.88 (2.40–5.36)       |
| OleicAcid                 | <i>N</i> = 27 | 119.72 (94.31–166.88)  |
| MyristoleicAcid           | <i>N</i> = 27 | 1.37 (0.86–1.69)       |
| LignocericAcid            | <i>N</i> = 27 | 4.15 (3.93–4.25)       |
| MargaricAcid              | <i>N</i> = 27 | 6.64 (5.36–8.14)       |
| oleanolic acid            | <i>N</i> = 27 | 8.46 (7.19–9.81)       |
| tripentadecanoate TG15    | <i>N</i> = 27 | 7.88 (6.24–10.27)      |
| Glyceryltrilinoleate1     | <i>N</i> = 27 | 27.80 (19.48–45.77)    |
| glyceryltripalmitoleate1  | <i>N</i> = 27 | 0.92 (0.56–1.21)       |
| 1linoleoyl-rac-GL         | <i>N</i> = 27 | 2.89 (2.08–4.05)       |
| 1oleoyl_rac_GL            | <i>N</i> = 27 | 9.61 (9.42–9.90)       |
| 1monopalmitoleoyl-rac-GL1 | <i>N</i> = 27 | 15.18 (15.15–15.25)    |
| desmosterol1              | <i>N</i> = 27 | 0.47 (0.38–0.60)       |
| CHOLESTEROL2              | <i>N</i> = 26 | 400.71 (291.32–641.45) |
| CA                        | <i>N</i> = 27 | 0.19 (0.10–0.59)       |
| CDCA                      | <i>N</i> = 27 | 0.34 (0.17–0.85)       |
| DCA                       | <i>N</i> = 27 | 0.04 (0.02–0.31)       |
| UDCA                      | <i>N</i> = 27 | 0.04 (0.03–0.06)       |
| LCA                       | <i>N</i> = 27 | 0.17 (0.16–0.18)       |
| G-CA                      | <i>N</i> = 27 | 1.63 (0.30–18.08)      |
| G-CDCA                    | <i>N</i> = 27 | 2.09 (1.06–6.49)       |
| G-DCA                     | <i>N</i> = 27 | 0.33 (0.11–1.08)       |
| G-UDCA                    | <i>N</i> = 27 | 0.16 (0.11–0.35)       |
| G-LCA                     | <i>N</i> = 27 | 0.04 (0.03–0.07)       |
| T-CA                      | <i>N</i> = 27 | 0.47 (0.13–5.48)       |
| T-CDCA                    | <i>N</i> = 27 | 2.39 (0.42–6.46)       |
| T-DCA                     | <i>N</i> = 27 | 0.47 (0.14–1.42)       |
| T-UDCA                    | <i>N</i> = 24 | 0.06 (0.02–0.25)       |
| T-LCA                     | <i>N</i> = 27 | 0.03 (0.03–0.04)       |
